# Supplementary material for: First-principles predictions of low lattice thermal conductivity and high thermoelectric performance of AZnSb (A = Rb, Cs)
Source: Royal Society of Chemistry journal article supplement (doi:10.1039/d1ra01938d), 2021-01-01
Supplement: d1ra01938d1.pdf [file d1ra01938d1.pdf]

## Electronic Supplementary Information

### First-principles predictions of low lattice thermal conductivity and high thermoelectric performance of AZnSb (A=Rb, Cs)

Enamul Haque

EH Solid State Physics Laboratory, Longaer, Gaffargaon-2233, Mymensingh, Bangladesh.

Email: [enamul.phy15@yahoo.com](mailto:enamul.phy15@yahoo.com)

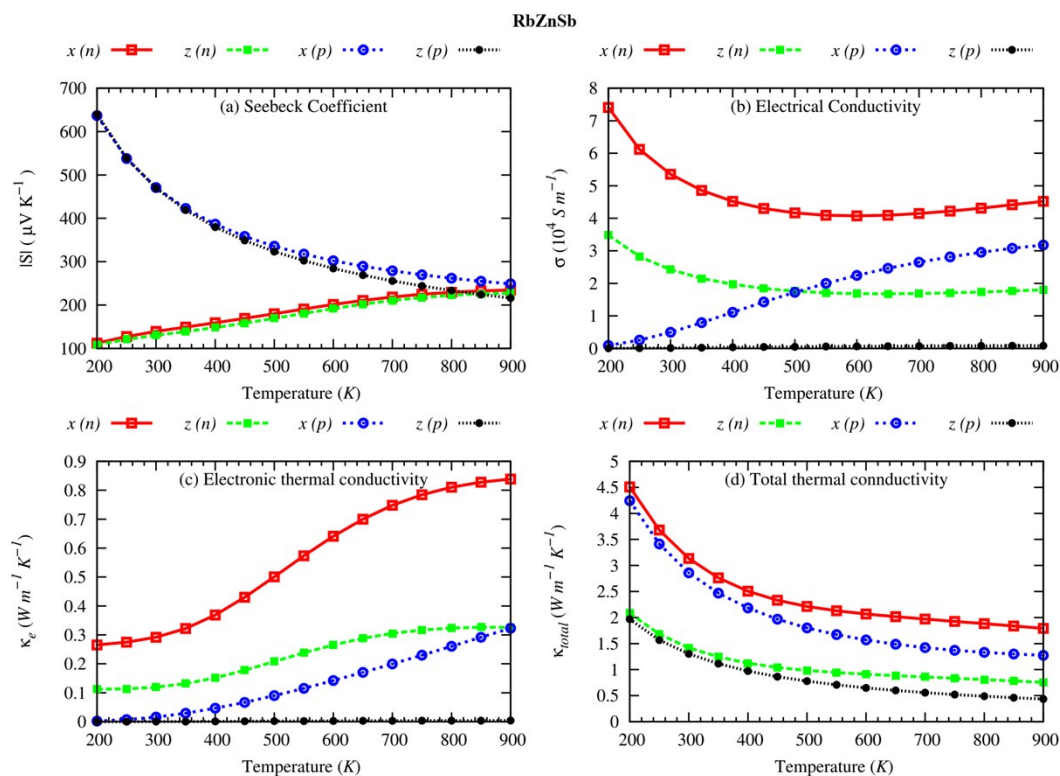

Fig. S1. Temperature dependent transport coefficient of RbZnSb.

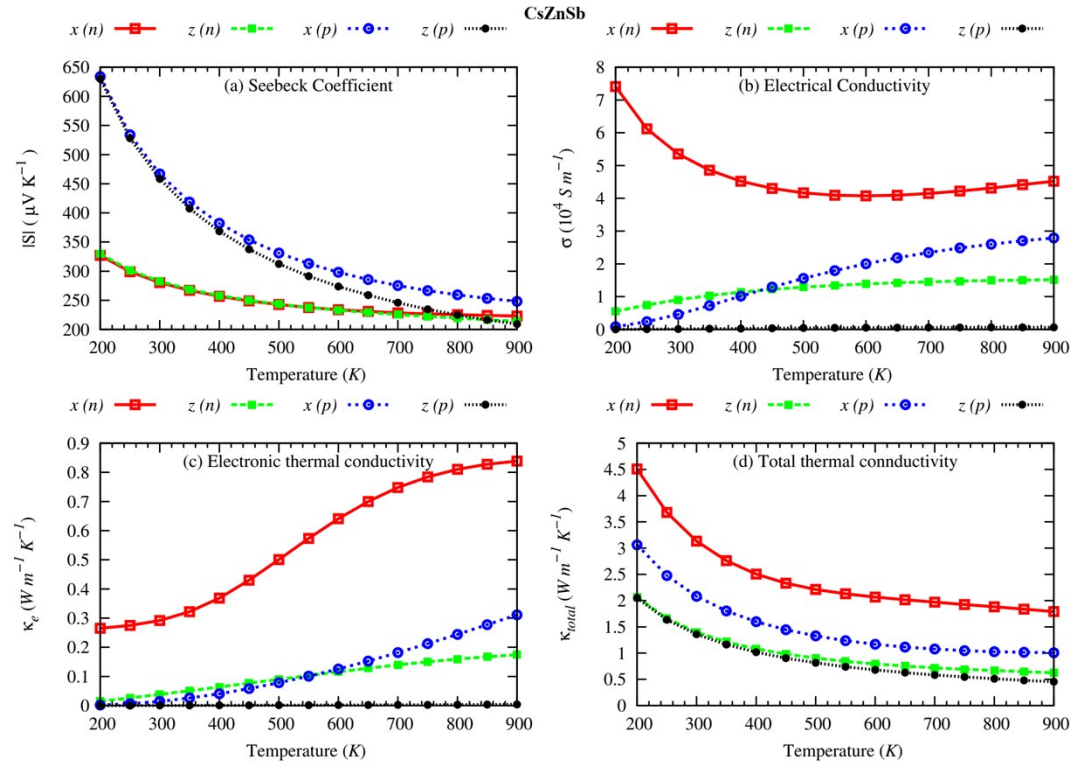

Fig. S2. Temperature dependent transport coefficient of CsZnSb.
